# Supplementary material for: Oxidation of [3]naphthylenes to cations and dications converts local paratropicity into global diatropicity
Source: publisher site journal article supplement (doi:10.3762/bjoc.21.20), 2025-02-05

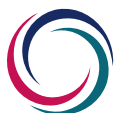

## Supporting Information

for

### **Oxidation of [3]naphthylenes to cations and dications converts local paratropicity into global diatropicity**

Abel Cárdenas, Zexin Jin, Yong Ni, Jishan Wu, Yan Xia, Francisco Javier Ramírez and Juan Casado

*Beilstein J. Org. Chem.* **2025**, *21*, 277–285. doi:10.3762/bjoc.21.20

**Chemical structures of m-1 and m-2, vibrational assignment of m-1, the 1730 cm<sup>-1</sup> normal mode, theoretical Raman spectrum of m-1, details of the force field calculations, theoretical Raman spectra of m-1 and m-2, and ACID plots of m-1 and m-2**

## Table of contents

|                                                              |     |
|--------------------------------------------------------------|-----|
| Chemical structures of <b>m-1</b> and <b>m-2</b> .....       | S2  |
| Basic quantum chemical data .....                            | S3  |
| Vibrational assignment of <b>m-1</b> .....                   | S23 |
| The 1730 cm <sup>-1</sup> normal mode .....                  | S23 |
| Theoretical Raman spectrum of <b>m-2</b> .....               | S24 |
| Details of force field calculations .....                    | S24 |
| Theoretical Raman spectra of <b>m-1</b> and <b>m-2</b> ..... | S26 |
| ACID plots of <b>m-1</b> and <b>m-2</b> .....                | S27 |

**Figure S1.** Chemical structures of the model compounds **m-1** and **m-2**.

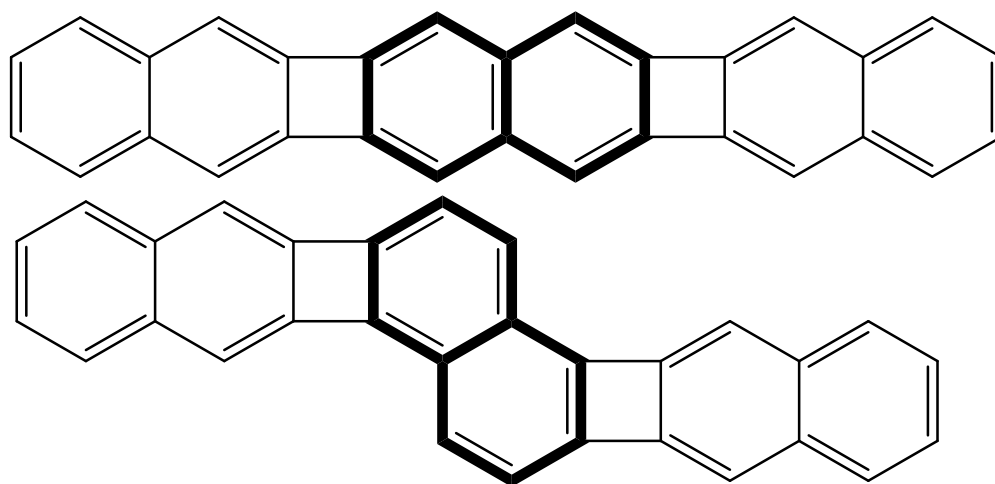

**Basic quantum chemical data.****Optimized geometries.****Table S1.** Z-matrix of the B3LYP/6-311G(d,p)-optimized geometry of **m-1**.

|     |             |             |             |
|-----|-------------|-------------|-------------|
| 0 1 |             |             |             |
| C   | -0.70408500 | 0.11672000  | 8.73125500  |
| C   | 0.70408500  | -0.11672000 | 8.73125500  |
| C   | 1.34909700  | -0.25463200 | 7.50359500  |
| C   | 0.70539200  | -0.14418200 | 6.25455500  |
| C   | -0.70539200 | 0.14418200  | 6.25455500  |
| C   | -1.34909700 | 0.25463200  | 7.50359500  |
| C   | 1.45068600  | -0.30477300 | 5.01506000  |
| C   | 0.70728800  | -0.14975700 | 3.88673600  |
| C   | -0.70728800 | 0.14975700  | 3.88673600  |
| C   | -1.45068600 | 0.30477300  | 5.01506000  |
| C   | 0.70369600  | -0.14924700 | 2.39321300  |
| C   | -0.70369600 | 0.14924700  | 2.39321300  |
| C   | 1.41524700  | -0.30021000 | 1.23862600  |
| C   | 0.70859700  | -0.15030800 | 0.00000000  |
| C   | -0.70859700 | 0.15030800  | 0.00000000  |
| C   | -1.41524700 | 0.30021000  | 1.23862600  |
| C   | 1.41524700  | -0.30021000 | -1.23862600 |
| C   | 0.70369600  | -0.14924700 | -2.39321300 |
| C   | -0.70369600 | 0.14924700  | -2.39321300 |
| C   | -1.41524700 | 0.30021000  | -1.23862600 |
| C   | 0.70728800  | -0.14975700 | -3.88673600 |
| C   | -0.70728800 | 0.14975700  | -3.88673600 |
| C   | 1.45068600  | -0.30477300 | -5.01506000 |
| C   | 0.70539200  | -0.14418200 | -6.25455500 |
| C   | -0.70539200 | 0.14418200  | -6.25455500 |
| C   | -1.45068600 | 0.30477300  | -5.01506000 |
| C   | 1.34909700  | -0.25463200 | -7.50359500 |
| C   | 0.70408500  | -0.11672000 | -8.73125500 |
| C   | -0.70408500 | 0.11672000  | -8.73125500 |
| C   | -1.34909700 | 0.25463200  | -7.50359500 |
| H   | 2.41497100  | -0.45602500 | 7.51926900  |
| H   | -2.41497100 | 0.45602500  | 7.51926900  |
| H   | 2.47779500  | -0.52559200 | 1.21640200  |
| H   | -2.47779500 | 0.52559200  | 1.21640200  |
| H   | 2.47779500  | -0.52559200 | -1.21640200 |
| H   | -2.47779500 | 0.52559200  | -1.21640200 |
| H   | 2.41497100  | -0.45602500 | -7.51926900 |
| H   | -2.41497100 | 0.45602500  | -7.51926900 |
| C   | 1.55806400  | -0.18288100 | 9.96896700  |
| C   | 2.48022200  | 0.86475500  | 10.22014900 |
| C   | 1.51853100  | -1.29715700 | 10.83779500 |
| C   | 3.28432400  | 0.81033300  | 11.36503100 |
| C   | 2.34807100  | -1.31797500 | 11.96573600 |
| C   | 3.21665700  | -0.26792100 | 12.24160400 |
| H   | 3.97700200  | 1.62477300  | 11.56112500 |
| H   | 2.31202100  | -2.17913600 | 12.62794400 |

|   |             |             |              |
|---|-------------|-------------|--------------|
| H | 3.84851900  | -0.29657200 | 13.12478100  |
| C | -1.55806400 | 0.18288100  | 9.96896700   |
| C | -2.48022200 | -0.86475500 | 10.22014900  |
| C | -1.51853100 | 1.29715700  | 10.83779500  |
| C | -3.28432400 | -0.81033300 | 11.36503100  |
| C | -2.34807100 | 1.31797500  | 11.96573600  |
| C | -3.21665700 | 0.26792100  | 12.24160400  |
| H | -3.97700200 | -1.62477300 | 11.56112500  |
| H | -2.31202100 | 2.17913600  | 12.62794400  |
| H | -3.84851900 | 0.29657200  | 13.12478100  |
| C | 1.55806400  | -0.18288100 | -9.96896700  |
| C | 1.51853100  | -1.29715700 | -10.83779500 |
| C | 2.48022200  | 0.86475500  | -10.22014900 |
| C | 2.34807100  | -1.31797500 | -11.96573600 |
| C | 3.28432400  | 0.81033300  | -11.36503100 |
| C | 3.21665700  | -0.26792100 | -12.24160400 |
| H | 2.31202100  | -2.17913600 | -12.62794400 |
| H | 3.97700200  | 1.62477300  | -11.56112500 |
| H | 3.84851900  | -0.29657200 | -13.12478100 |
| C | -1.55806400 | 0.18288100  | -9.96896700  |
| C | -1.51853100 | 1.29715700  | -10.83779500 |
| C | -2.48022200 | -0.86475500 | -10.22014900 |
| C | -2.34807100 | 1.31797500  | -11.96573600 |
| C | -3.28432400 | -0.81033300 | -11.36503100 |
| C | -3.21665700 | 0.26792100  | -12.24160400 |
| H | -2.31202100 | 2.17913600  | -12.62794400 |
| H | -3.97700200 | -1.62477300 | -11.56112500 |
| H | -3.84851900 | 0.29657200  | -13.12478100 |
| C | 2.66069300  | 2.03698900  | 9.27674500   |
| H | 3.34499800  | 1.78540700  | 8.45754900   |
| H | 1.72441100  | 2.35619100  | 8.81666100   |
| H | 3.09273600  | 2.89109900  | 9.80631600   |
| C | 0.63355500  | -2.49229800 | 10.57453700  |
| H | -0.37965500 | -2.33078900 | 10.95544100  |
| H | 0.55309900  | -2.70770100 | 9.50578200   |
| H | 1.03420100  | -3.38142800 | 11.06978300  |
| C | -0.63355500 | 2.49229800  | 10.57453700  |
| H | 0.37965500  | 2.33078900  | 10.95544100  |
| H | -0.55309900 | 2.70770100  | 9.50578200   |
| H | -1.03420100 | 3.38142800  | 11.06978300  |
| C | -2.66069300 | -2.03698900 | 9.27674500   |
| H | -3.09273600 | -2.89109900 | 9.80631600   |
| H | -3.34499800 | -1.78540700 | 8.45754900   |
| H | -1.72441100 | -2.35619100 | 8.81666100   |
| C | -0.63355500 | 2.49229800  | -10.57453700 |
| H | -0.55309900 | 2.70770100  | -9.50578200  |
| H | 0.37965500  | 2.33078900  | -10.95544100 |
| H | -1.03420100 | 3.38142800  | -11.06978300 |
| C | -2.66069300 | -2.03698900 | -9.27674500  |
| H | -1.72441100 | -2.35619100 | -8.81666100  |
| H | -3.34499800 | -1.78540700 | -8.45754900  |
| H | -3.09273600 | -2.89109900 | -9.80631600  |

|   |             |             |              |
|---|-------------|-------------|--------------|
| C | 0.63355500  | -2.49229800 | -10.57453700 |
| H | 0.55309900  | -2.70770100 | -9.50578200  |
| H | -0.37965500 | -2.33078900 | -10.95544100 |
| H | 1.03420100  | -3.38142800 | -11.06978300 |
| C | 2.66069300  | 2.03698900  | -9.27674500  |
| H | 1.72441100  | 2.35619100  | -8.81666100  |
| H | 3.34499800  | 1.78540700  | -8.45754900  |
| H | 3.09273600  | 2.89109900  | -9.80631600  |
| C | -2.92369100 | 0.61518800  | -4.99770400  |
| H | -3.14624700 | 1.55507300  | -5.51621600  |
| H | -3.51009900 | -0.16986300 | -5.48971000  |
| H | -3.28477400 | 0.70633300  | -3.97072900  |
| C | 2.92369100  | -0.61518800 | -4.99770400  |
| H | 3.14624700  | -1.55507300 | -5.51621600  |
| H | 3.51009900  | 0.16986300  | -5.48971000  |
| H | 3.28477400  | -0.70633300 | -3.97072900  |
| C | -2.92369100 | 0.61518800  | 4.99770400   |
| H | -3.51009900 | -0.16986300 | 5.48971000   |
| H | -3.14624700 | 1.55507300  | 5.51621600   |
| H | -3.28477400 | 0.70633300  | 3.97072900   |
| C | 2.92369100  | -0.61518800 | 4.99770400   |
| H | 3.51009900  | 0.16986300  | 5.48971000   |
| H | 3.14624700  | -1.55507300 | 5.51621600   |
| H | 3.28477400  | -0.70633300 | 3.97072900   |

**Table S2.** Z-matrix of the UB3LYP/6-311G(d,p)-optimized geometry of the radical cation of **m-1**.

1 2

|   |             |             |             |
|---|-------------|-------------|-------------|
| C | 8.69184500  | 0.71024800  | -0.11687600 |
| C | 8.69184700  | -0.71022700 | 0.11689400  |
| C | 7.46908200  | -1.35519400 | 0.25321900  |
| C | 6.21657200  | -0.71181900 | 0.14330900  |
| C | 6.21657100  | 0.71183400  | -0.14328000 |
| C | 7.46907900  | 1.35521000  | -0.25320200 |
| C | 4.99147900  | -1.46066500 | 0.30640800  |
| C | 3.85828300  | -0.71112100 | 0.15104100  |
| C | 3.85828200  | 0.71113200  | -0.15100800 |
| C | 4.99147700  | 1.46067900  | -0.30637900 |
| C | 2.38556800  | -0.71209000 | 0.15131000  |
| C | 2.38556600  | 0.71210000  | -0.15127100 |
| C | 1.23099500  | -1.42788300 | 0.30309000  |
| C | 0.00000000  | -0.72160800 | 0.15315600  |
| C | -0.00000200 | 0.72161600  | -0.15310700 |
| C | 1.23099200  | 1.42789200  | -0.30304600 |
| C | -1.23099400 | -1.42788400 | 0.30309300  |
| C | -2.38556900 | -0.71209200 | 0.15131500  |
| C | -2.38557000 | 0.71209800  | -0.15126100 |
| C | -1.23099700 | 1.42789200  | -0.30304200 |
| C | -3.85828500 | -0.71112600 | 0.15104400  |
| C | -3.85828600 | 0.71112900  | -0.15099500 |
| C | -4.99148200 | -1.46067500 | 0.30640000  |
| C | -6.21657500 | -0.71183100 | 0.14329600  |

|   |              |             |             |
|---|--------------|-------------|-------------|
| C | -6.21657600  | 0.71182500  | -0.14327500 |
| C | -4.99148300  | 1.46067400  | -0.30636200 |
| C | -7.46908600  | -1.35520700 | 0.25321100  |
| C | -8.69185100  | -0.71024600 | 0.11688300  |
| C | -8.69185300  | 0.71022600  | -0.11690300 |
| C | -7.46908800  | 1.35519700  | -0.25320200 |
| H | 7.48600200   | -2.41948600 | 0.45776100  |
| H | 7.48599700   | 2.41949900  | -0.45776100 |
| H | 1.21053600   | -2.48921000 | 0.52842700  |
| H | 1.21053100   | 2.48921900  | -0.52838200 |
| H | -1.21053400  | -2.48921200 | 0.52842600  |
| H | -1.21053800  | 2.48921900  | -0.52837500 |
| H | -7.48600300  | -2.41949600 | 0.45777100  |
| H | -7.48600800  | 2.41948800  | -0.45774800 |
| C | 9.93100200   | -1.55522300 | 0.19319600  |
| C | 10.17412300  | -2.50324200 | -0.83415300 |
| C | 10.80711600  | -1.47772300 | 1.30073600  |
| C | 11.32515900  | -3.29609900 | -0.76795800 |
| C | 11.93769700  | -2.30216600 | 1.33268800  |
| C | 12.20920600  | -3.19482900 | 0.30190200  |
| H | 11.52173500  | -4.00636100 | -1.56632100 |
| H | 12.60566300  | -2.24336300 | 2.18751000  |
| H | 13.09590700  | -3.82040800 | 0.33924500  |
| C | 9.93100600   | 1.55523300  | -0.19321600 |
| C | 10.17418800  | 2.50323400  | 0.83413800  |
| C | 10.80708500  | 1.47772100  | -1.30078300 |
| C | 11.32523900  | 3.29606700  | 0.76790700  |
| C | 11.93768000  | 2.30214200  | -1.33277000 |
| C | 12.20924100  | 3.19479400  | -0.30198800 |
| H | 11.52186200  | 4.00631100  | 1.56627500  |
| H | 12.60561500  | 2.24333000  | -2.18761600 |
| H | 13.09595600  | 3.82035200  | -0.33935500 |
| C | -9.93101400  | -1.55521900 | 0.19322200  |
| C | -10.80709600 | -1.47769000 | 1.30078200  |
| C | -10.17418000 | -2.50323700 | -0.83411400 |
| C | -11.93767800 | -2.30213000 | 1.33278700  |
| C | -11.32521400 | -3.29609300 | -0.76786800 |
| C | -12.20922400 | -3.19480800 | 0.30202200  |
| H | -12.60561300 | -2.24331500 | 2.18763300  |
| H | -11.52182200 | -4.00635900 | -1.56622000 |
| H | -13.09593200 | -3.82037700 | 0.33939900  |
| C | -9.93101100  | 1.55520900  | -0.19324300 |
| C | -10.80707600 | 1.47771000  | -1.30082000 |
| C | -10.17417500 | 2.50321600  | 0.83410200  |
| C | -11.93764800 | 2.30216500  | -1.33282400 |
| C | -11.32520000 | 3.29608600  | 0.76785500  |
| C | -12.20919900 | 3.19482600  | -0.30204600 |
| H | -12.60557400 | 2.24337100  | -2.18767800 |
| H | -11.52180700 | 4.00634400  | 1.56621300  |
| H | -13.09589600 | 3.82040900  | -0.33942700 |
| C | 9.22943700   | -2.71674300 | -2.00026300 |
| H | 8.42521400   | -3.41535400 | -1.73887500 |

|   |              |             |             |
|---|--------------|-------------|-------------|
| H | 8.75359400   | -1.79450300 | -2.33791800 |
| H | 9.76476700   | -3.15152900 | -2.84852700 |
| C | 10.54915300  | -0.56942100 | 2.47987500  |
| H | 10.96102000  | 0.43044800  | 2.31232700  |
| H | 9.48115100   | -0.45857200 | 2.68559700  |
| H | 11.02159600  | -0.97184500 | 3.37991200  |
| C | 10.54907000  | 0.56942100  | -2.47991200 |
| H | 10.96096800  | -0.43044100 | -2.31239500 |
| H | 9.48105900   | 0.45855300  | -2.68557300 |
| H | 11.02145400  | 0.97185900  | -3.37997500 |
| C | 9.22957800   | 2.71672200  | 2.00031100  |
| H | 9.76497700   | 3.15143400  | 2.84856900  |
| H | 8.42538200   | 3.41539500  | 1.73900200  |
| H | 8.75369900   | 1.79449300  | 2.33794500  |
| C | -10.54905800 | 0.56940400  | -2.47994600 |
| H | -9.48104600  | 0.45854900  | -2.68561800 |
| H | -10.96093500 | -0.43046400 | -2.31241600 |
| H | -11.02145800 | 0.97182800  | -3.38000500 |
| C | -9.22953200  | 2.71669100  | 2.00025000  |
| H | -8.75380000  | 1.79442000  | 2.33798500  |
| H | -8.42522200  | 3.41520300  | 1.73886500  |
| H | -9.76486400  | 3.15158000  | 2.84845900  |
| C | -10.54908400 | -0.56936500 | 2.47989400  |
| H | -9.48107200  | -0.45846700 | 2.68553800  |
| H | -10.96100800 | 0.43048500  | 2.31236800  |
| H | -11.02144500 | -0.97180000 | 3.37997000  |
| C | -9.22954600  | -2.71673200 | -2.00026700 |
| H | -8.75372100  | -1.79449000 | -2.33794700 |
| H | -8.42530900  | -3.41534000 | -1.73890800 |
| H | -9.76490900  | -3.15152400 | -2.84850700 |
| C | -4.97081900  | 2.93235900  | -0.61617200 |
| H | -5.49116300  | 3.15215500  | -1.55465000 |
| H | -5.46097900  | 3.51563400  | 0.17101900  |
| H | -3.94477000  | 3.29397700  | -0.70964200 |
| C | -4.97081500  | -2.93235800 | 0.61621600  |
| H | -5.49117400  | -3.15215300 | 1.55468700  |
| H | -5.46095800  | -3.51563900 | -0.17098100 |
| H | -3.94476600  | -3.29397100 | 0.70970600  |
| C | 4.97081000   | 2.93236100  | -0.61620100 |
| H | 5.46095700   | 3.51564500  | 0.17099100  |
| H | 5.49116600   | 3.15215000  | -1.55467400 |
| H | 3.94476100   | 3.29397400  | -0.70968800 |
| C | 4.97081600   | -2.93234900 | 0.61622400  |
| H | 5.46096700   | -3.51562900 | -0.17096800 |
| H | 5.49117100   | -3.15214000 | 1.55469800  |
| H | 3.94476800   | -3.29396500 | 0.70970800  |



**Table S3.** Z-matrix of the B3LYP/6-311G(d,p)-optimized geometry of the closed-shell dication of **m-1**.

**A) B3LYP/6-311G(D,P) CLOSED-SHELL STATE OF THE DICATION OF m-1.**

|     |             |             |             |
|-----|-------------|-------------|-------------|
| 2 1 |             |             |             |
| C   | 8.67091600  | 0.71606400  | -0.11733700 |
| C   | 8.67092200  | -0.71590200 | 0.11753800  |
| C   | 7.44797700  | -1.36597200 | 0.22647000  |
| C   | 6.19758900  | -0.72109800 | 0.12540500  |
| C   | 6.19758200  | 0.72121500  | -0.12527800 |
| C   | 7.44796100  | 1.36610300  | -0.22634500 |
| C   | 4.97805400  | -1.47386800 | 0.28155100  |
| C   | 3.84428700  | -0.71776300 | 0.14063900  |
| C   | 3.84427900  | 0.71783000  | -0.14062100 |
| C   | 4.97803700  | 1.47395700  | -0.28148900 |
| C   | 2.38248800  | -0.71785100 | 0.13967800  |
| C   | 2.38248300  | 0.71789400  | -0.13970700 |
| C   | 1.22698900  | -1.43907000 | 0.27839100  |
| C   | -0.00005100 | -0.73080800 | 0.14110600  |
| C   | -0.00005500 | 0.73082400  | -0.14118200 |
| C   | 1.22697700  | 1.43910000  | -0.27844200 |
| C   | -1.22708300 | -1.43907900 | 0.27838600  |
| C   | -2.38258900 | -0.71787400 | 0.13964500  |
| C   | -2.38259300 | 0.71786600  | -0.13977600 |
| C   | -1.22709400 | 1.43908400  | -0.27848700 |
| C   | -3.84438200 | -0.71780200 | 0.14059200  |
| C   | -3.84439000 | 0.71778100  | -0.14072300 |
| C   | -4.97814200 | -1.47391400 | 0.28154100  |
| C   | -6.19768200 | -0.72116500 | 0.12535000  |
| C   | -6.19768900 | 0.72112900  | -0.12542400 |
| C   | -4.97815500 | 1.47388700  | -0.28164100 |
| C   | -7.44806600 | -1.36602700 | 0.22649500  |
| C   | -8.67103100 | -0.71599100 | 0.11748900  |
| C   | -8.67103800 | 0.71595000  | -0.11750500 |
| C   | -7.44807700 | 1.36598800  | -0.22653400 |
| H   | 7.46272400  | -2.42904400 | 0.43261500  |
| H   | 7.46268700  | 2.42915000  | -0.43260600 |
| H   | 1.20807300  | -2.50385100 | 0.48483600  |
| H   | 1.20805500  | 2.50388200  | -0.48488800 |
| H   | -1.20816100 | -2.50385800 | 0.48484300  |
| H   | -1.20817600 | 2.50386400  | -0.48494100 |
| H   | -7.46280100 | -2.42907000 | 0.43278200  |
| H   | -7.46282000 | 2.42903300  | -0.43281000 |
| C   | 9.91444800  | -1.52691000 | 0.24732700  |
| C   | 10.15110500 | -2.58665900 | -0.67622000 |
| C   | 10.82996000 | -1.29844100 | 1.31291800  |
| C   | 11.33297100 | -3.32020600 | -0.56671400 |
| C   | 11.98876900 | -2.07658500 | 1.38976900  |
| C   | 12.25374800 | -3.06764500 | 0.45222900  |
| H   | 11.53702400 | -4.10222500 | -1.29210400 |
| H   | 12.68027200 | -1.90959300 | 2.21041600  |
| H   | 13.16277600 | -3.65678900 | 0.52149100  |

|   |              |             |             |
|---|--------------|-------------|-------------|
| C | 9.91446800   | 1.52700400  | -0.24730300 |
| C | 10.15133500  | 2.58681700  | 0.67614600  |
| C | 10.82993300  | 1.29826000  | -1.31286800 |
| C | 11.33331100  | 3.32015600  | 0.56651400  |
| C | 11.98887500  | 2.07620300  | -1.38983700 |
| C | 12.25402400  | 3.06733500  | -0.45243500 |
| H | 11.53753100  | 4.10220200  | 1.29182600  |
| H | 12.68034200  | 1.90898200  | -2.21046800 |
| H | 13.16314800  | 3.65631900  | -0.52177600 |
| C | -9.91450300  | -1.52706800 | 0.24752400  |
| C | -10.82984900 | -1.29857100 | 1.31324500  |
| C | -10.15122700 | -2.58695700 | -0.67587000 |
| C | -11.98852800 | -2.07687300 | 1.39042700  |
| C | -11.33297200 | -3.32065200 | -0.56603100 |
| C | -12.25356100 | -3.06809800 | 0.45307300  |
| H | -12.67989300 | -1.90987000 | 2.21118700  |
| H | -11.53707600 | -4.10277300 | -1.29129700 |
| H | -13.16249300 | -3.65735900 | 0.52260300  |
| C | -9.91449800  | 1.52705100  | -0.24749900 |
| C | -10.82989400 | 1.29860600  | -1.31318900 |
| C | -10.15113500 | 2.58694400  | 0.67590600  |
| C | -11.98852400 | 2.07697900  | -1.39032900 |
| C | -11.33286300 | 3.32068100  | 0.56614100  |
| C | -12.25349200 | 3.06819200  | -0.45293900 |
| H | -12.67992100 | 1.91002900  | -2.21107300 |
| H | -11.53690400 | 4.10279600  | 1.29143000  |
| H | -13.16240200 | 3.65749000  | -0.52243100 |
| C | 9.19811400   | -2.95180500 | -1.79659600 |
| H | 8.45815000   | -3.69021400 | -1.46488800 |
| H | 8.64732500   | -2.09617000 | -2.19072800 |
| H | 9.74662100   | -3.40779200 | -2.62440000 |
| C | 10.57063500  | -0.31627500 | 2.43179900  |
| H | 11.15732500  | 0.59865300  | 2.30501400  |
| H | 9.51908200   | -0.03694300 | 2.51145300  |
| H | 10.86526600  | -0.75851300 | 3.38790400  |
| C | 10.57044500  | 0.31600800  | -2.43163400 |
| H | 11.15758200  | -0.59867600 | -2.30515000 |
| H | 9.51897500   | 0.03624700  | -2.51079000 |
| H | 10.86443000  | 0.75839100  | -3.38787600 |
| C | 9.19852700   | 2.95213700  | 1.79662200  |
| H | 9.74711900   | 3.40867500  | 2.62406500  |
| H | 8.45819300   | 3.69013300  | 1.46483500  |
| H | 8.64817100   | 2.09646700  | 2.19128900  |
| C | -10.57064000 | 0.31611500  | -2.43179700 |
| H | -9.51892200  | 0.03752300  | -2.51201300 |
| H | -11.15654200 | -0.59919700 | -2.30416200 |
| H | -10.86625400 | 0.75766200  | -3.38790900 |
| C | -9.19829900  | 2.95201400  | 1.79644300  |
| H | -8.64800900  | 2.09624400  | 2.19097800  |
| H | -8.45791200  | 3.69000700  | 1.46476500  |
| H | -9.74685700  | 3.40846900  | 2.62395500  |
| C | -10.57048400 | -0.31614500 | 2.43188600  |

|   |              |             |             |
|---|--------------|-------------|-------------|
| H | -9.51878900  | -0.03742600 | 2.51191500  |
| H | -11.15653400 | 0.59910300  | 2.30446600  |
| H | -10.86583400 | -0.75783100 | 3.38801800  |
| C | -9.19849100  | -2.95206300 | -1.79648300 |
| H | -8.64802700  | -2.09635400 | -2.19089500 |
| H | -8.45826800  | -3.69027800 | -1.46492700 |
| H | -9.74716600  | -3.40827300 | -2.62405400 |
| C | -4.95621900  | 2.95042900  | -0.56381000 |
| H | -5.47449300  | 3.18678200  | -1.49919600 |
| H | -5.44556500  | 3.51843200  | 0.23449300  |
| H | -3.93053700  | 3.31367900  | -0.65009700 |
| C | -4.95618800  | -2.95045400 | 0.56371500  |
| H | -5.47442400  | -3.18680600 | 1.49912300  |
| H | -5.44556500  | -3.51846100 | -0.23456600 |
| H | -3.93050100  | -3.31370000 | 0.64996000  |
| C | 4.95608100   | 2.95051100  | -0.56359600 |
| H | 5.44536100   | 3.51849100  | 0.23476400  |
| H | 5.47440500   | 3.18692200  | -1.49894000 |
| H | 3.93039400   | 3.31373700  | -0.64993000 |
| C | 4.95611800   | -2.95042800 | 0.56363100  |
| H | 5.44545500   | -3.51838000 | -0.23471500 |
| H | 5.47439900   | -3.18684300 | 1.49899800  |
| H | 3.93043600   | -3.31368100 | 0.64990300  |

**B) UB3LYP/6-311G(D,P) OPEN-SHELL BROKEN SYMMETRY - DICATION OF M-1.**

2 1

|   |             |             |             |
|---|-------------|-------------|-------------|
| C | 8.67100500  | 0.71598000  | -0.11755300 |
| C | 8.67100200  | -0.71597500 | 0.11741700  |
| C | 7.44805000  | -1.36602600 | 0.22638700  |
| C | 6.19767200  | -0.72114100 | 0.12530200  |
| C | 6.19767500  | 0.72116800  | -0.12535800 |
| C | 7.44805500  | 1.36604100  | -0.22648100 |
| C | 4.97812300  | -1.47389500 | 0.28147100  |
| C | 3.84436500  | -0.71778000 | 0.14062300  |
| C | 3.84436600  | 0.71783800  | -0.14054700 |
| C | 4.97812800  | 1.47393700  | -0.28146400 |
| C | 2.38256400  | -0.71784600 | 0.13971300  |
| C | 2.38256600  | 0.71791400  | -0.13960300 |
| C | 1.22706200  | -1.43906700 | 0.27834600  |
| C | 0.00002700  | -0.73078300 | 0.14112900  |
| C | 0.00003000  | 0.73085800  | -0.14102200 |
| C | 1.22706400  | 1.43913700  | -0.27824500 |
| C | -1.22700800 | -1.43906300 | 0.27833200  |
| C | -2.38250900 | -0.71783500 | 0.13970700  |
| C | -2.38250700 | 0.71792900  | -0.13957700 |
| C | -1.22700500 | 1.43914700  | -0.27822200 |
| C | -3.84430700 | -0.71776800 | 0.14061900  |
| C | -3.84431200 | 0.71785900  | -0.14050100 |
| C | -4.97806500 | -1.47389300 | 0.28143200  |
| C | -6.19761500 | -0.72113800 | 0.12530300  |

|   |              |             |             |
|---|--------------|-------------|-------------|
| C | -6.19762300  | 0.72118800  | -0.12527400 |
| C | -4.97807200  | 1.47396200  | -0.28136700 |
| C | -7.44799100  | -1.36604500 | 0.22632800  |
| C | -8.67093500  | -0.71598200 | 0.11739600  |
| C | -8.67094100  | 0.71599100  | -0.11743600 |
| C | -7.44800000  | 1.36607300  | -0.22633700 |
| H | 7.46278700   | -2.42908600 | 0.43258900  |
| H | 7.46279800   | 2.42910600  | -0.43266000 |
| H | 1.20813800   | -2.50386800 | 0.48469700  |
| H | 1.20814400   | 2.50393800  | -0.48460100 |
| H | -1.20809000  | -2.50386600 | 0.48467700  |
| H | -1.20808100  | 2.50394900  | -0.48457000 |
| H | -7.46272800  | -2.42912400 | 0.43243400  |
| H | -7.46275100  | 2.42915300  | -0.43244100 |
| C | 9.91452400   | -1.52699800 | 0.24747900  |
| C | 10.15144200  | -2.58678000 | -0.67598400 |
| C | 10.82969800  | -1.29854100 | 1.31335600  |
| C | 11.33327100  | -3.32032600 | -0.56612700 |
| C | 11.98844100  | -2.07674800 | 1.39060000  |
| C | 12.25371200  | -3.06779000 | 0.45312400  |
| H | 11.53754700  | -4.10235200 | -1.29144600 |
| H | 12.67967700  | -1.90979000 | 2.21147600  |
| H | 13.16270300  | -3.65695600 | 0.52267300  |
| C | 9.91453500   | 1.52698700  | -0.24756900 |
| C | 10.15140500  | 2.58677800  | 0.67589200  |
| C | 10.82981400  | 1.29847200  | -1.31334600 |
| C | 11.33326400  | 3.32029000  | 0.56612300  |
| C | 11.98861800  | 2.07660300  | -1.39047200 |
| C | 12.25381600  | 3.06767500  | -0.45301200 |
| H | 11.53749400  | 4.10233000  | 1.29144000  |
| H | 12.67994700  | 1.90956700  | -2.21125400 |
| H | 13.16284300  | 3.65679700  | -0.52247100 |
| C | -9.91449800  | -1.52696900 | 0.24731000  |
| C | -10.82972300 | -1.29856100 | 1.31315100  |
| C | -10.15147500 | -2.58657400 | -0.67633600 |
| C | -11.98858400 | -2.07662100 | 1.39018400  |
| C | -11.33339400 | -3.32000200 | -0.56666400 |
| C | -12.25388900 | -3.06750100 | 0.45255500  |
| H | -12.67987600 | -1.90967500 | 2.21101600  |
| H | -11.53771600 | -4.10189300 | -1.29211600 |
| H | -13.16295800 | -3.65656600 | 0.52194000  |
| C | -9.91452200  | 1.52693400  | -0.24734700 |
| C | -10.82981100 | 1.29840900  | -1.31311300 |
| C | -10.15147300 | 2.58662000  | 0.67621700  |
| C | -11.98872400 | 2.07639400  | -1.39011800 |
| C | -11.33342700 | 3.31998900  | 0.56656100  |
| C | -12.25400100 | 3.06734300  | -0.45255500 |
| H | -12.68006600 | 1.90934800  | -2.21088800 |
| H | -11.53772600 | 4.10194500  | 1.29194900  |
| H | -13.16310200 | 3.65636200  | -0.52191800 |
| C | 9.19878600   | -2.95192700 | -1.79664300 |
| H | 8.45845600   | -3.69001900 | -1.46506100 |

|   |              |             |             |
|---|--------------|-------------|-------------|
| H | 8.64844500   | -2.09621000 | -2.19121000 |
| H | 9.74748400   | -3.40830000 | -2.62410900 |
| C | 10.57006700  | -0.31628000 | 2.43207600  |
| H | 11.15570200  | 0.59923000  | 2.30461200  |
| H | 9.51825800   | -0.03801900 | 2.51225500  |
| H | 10.86574300  | -0.75786300 | 3.38815200  |
| C | 10.57023000  | 0.31625400  | -2.43211500 |
| H | 11.15634600  | -0.59899900 | -2.30501000 |
| H | 9.51852800   | 0.03752600  | -2.51197400 |
| H | 10.86536000  | 0.75813000  | -3.38823000 |
| C | 9.19868300   | 2.95193000  | 1.79649500  |
| H | 9.74734300   | 3.40823100  | 2.62402700  |
| H | 8.45842000   | 3.69007900  | 1.46489000  |
| H | 8.64827200   | 2.09621800  | 2.19097400  |
| C | -10.57011700 | 0.31638100  | -2.43202400 |
| H | -9.51845300  | 0.03747400  | -2.51168900 |
| H | -11.15644200 | -0.59878800 | -2.30525700 |
| H | -10.86492900 | 0.75852100  | -3.38811800 |
| C | -9.19873400  | 2.95181500  | 1.79678800  |
| H | -8.64821100  | 2.09614500  | 2.19120100  |
| H | -8.45856300  | 3.69005500  | 1.46518000  |
| H | -9.74739800  | 3.40802100  | 2.62437000  |
| C | -10.57004400 | -0.31652300 | 2.43205500  |
| H | -9.51833900  | -0.03779300 | 2.51187000  |
| H | -11.15618000 | 0.59874600  | 2.30513800  |
| H | -10.86509300 | -0.75854800 | 3.38812600  |
| C | -9.19880500  | -2.95162400 | -1.79701300 |
| H | -8.64836900  | -2.09589100 | -2.19141500 |
| H | -8.45855300  | -3.68983500 | -1.46552200 |
| H | -9.74750600  | -3.40780800 | -2.62458200 |
| C | -4.95614100  | 2.95054200  | -0.56336100 |
| H | -5.47454500  | 3.18702900  | -1.49864100 |
| H | -5.44535300  | 3.51846000  | 0.23508600  |
| H | -3.93046300  | 3.31377800  | -0.64975600 |
| C | -4.95611300  | -2.95047400 | 0.56341600  |
| H | -5.47454700  | -3.18698000 | 1.49867400  |
| H | -5.44528100  | -3.51839800 | -0.23505400 |
| H | -3.93043000  | -3.31368900 | 0.64985000  |
| C | 4.95618800   | 2.95050400  | -0.56352100 |
| H | 5.44538700   | 3.51845800  | 0.23490900  |
| H | 5.47459900   | 3.18695800  | -1.49880500 |
| H | 3.93050700   | 3.31372800  | -0.64994300 |
| C | 4.95617700   | -2.95046200 | 0.56352900  |
| H | 5.44532300   | -3.51842400 | -0.23492800 |
| H | 5.47463700   | -3.18692400 | 1.49878300  |
| H | 3.93049600   | -3.31367100 | 0.65000900  |

**Table S4.** Z-matrix of the B3LYP/6-311G(d,p)-optimized geometry of **m-2**.

0 1

|   |              |             |             |
|---|--------------|-------------|-------------|
| C | 8.31825800   | -0.73762200 | 0.02744300  |
| C | 8.14805900   | 0.67400000  | -0.02657400 |
| C | 6.84658700   | 1.18291000  | -0.02048200 |
| C | 5.68707000   | 0.38757500  | 0.00167700  |
| C | 5.86092000   | -1.03833100 | 0.00339000  |
| C | 7.17413200   | -1.53926100 | 0.02362500  |
| C | 4.35714100   | 1.00167500  | 0.01006700  |
| C | 3.32567000   | 0.11854500  | 0.00413700  |
| C | 3.51029200   | -1.32045100 | -0.00263500 |
| C | 4.71365800   | -1.94198500 | -0.00305400 |
| C | 1.83406700   | -0.10588900 | 0.00211300  |
| C | 2.02855700   | -1.49591800 | -0.00277500 |
| C | 0.55419600   | 0.47996800  | 0.00049700  |
| C | -0.55419200  | -0.47999000 | 0.00045800  |
| C | -0.30776000  | -1.88197000 | -0.00356600 |
| C | 0.97313800   | -2.41310500 | -0.00622700 |
| C | 0.30776600   | 1.88194800  | -0.00343300 |
| C | -0.97313300  | 2.41308300  | -0.00605900 |
| C | -2.02855100  | 1.49589600  | -0.00267600 |
| C | -1.83406200  | 0.10586700  | 0.00210100  |
| C | -3.51028600  | 1.32043100  | -0.00256200 |
| C | -3.32566600  | -0.11856600 | 0.00408400  |
| C | -4.71365000  | 1.94196600  | -0.00294500 |
| C | -5.86091400  | 1.03831400  | 0.00339500  |
| C | -5.68706500  | -0.38759300 | 0.00154500  |
| C | -4.35713800  | -1.00169500 | 0.00989200  |
| C | -7.17412500  | 1.53924300  | 0.02367900  |
| C | -8.31825200  | 0.73760400  | 0.02740400  |
| C | -8.14805500  | -0.67401400 | -0.02674700 |
| C | -6.84658300  | -1.18292500 | -0.02068400 |
| H | 6.73672100   | 2.26171100  | -0.03695200 |
| H | 7.31811000   | -2.61442800 | 0.03951900  |
| H | -1.16119000  | -2.55033900 | -0.00812600 |
| H | 1.13029800   | -3.48693800 | -0.01090300 |
| H | 1.16119700   | 2.55031700  | -0.00795600 |
| H | -1.13029200  | 3.48691600  | -0.01066000 |
| H | -7.31810400  | 2.61440800  | 0.03970200  |
| H | -6.73671700  | -2.26172500 | -0.03722700 |
| C | -9.64706400  | 1.43642200  | 0.13135100  |
| C | -10.53098800 | 1.51597700  | -0.96890100 |
| C | -9.97892700  | 2.09758100  | 1.34121900  |
| C | -11.74729800 | 2.19469800  | -0.82475500 |
| C | -11.20984100 | 2.75625700  | 1.44741800  |
| C | -12.09735200 | 2.80021900  | 0.37691700  |
| H | -12.42062600 | 2.25177300  | -1.67611300 |
| H | -11.46579000 | 3.24630200  | 2.38334100  |
| H | -13.04799900 | 3.31685100  | 0.47412200  |
| C | -9.27333500  | -1.66785400 | -0.13296000 |
| C | -10.11545900 | -1.95451300 | 0.96561400  |

|   |              |             |             |
|---|--------------|-------------|-------------|
| C | -9.43720200  | -2.38859300 | -1.34326300 |
| C | -11.13619500 | -2.90196400 | 0.81952700  |
| C | -10.47683200 | -3.32013100 | -1.45141100 |
| C | -11.33059600 | -3.57320500 | -0.38248100 |
| H | -11.77849700 | -3.11681000 | 1.66966700  |
| H | -10.60780000 | -3.85668100 | -2.38766700 |
| H | -12.13164600 | -4.30029800 | -0.48120300 |
| C | 9.27332900   | 1.66785300  | -0.13275900 |
| C | 10.11548500  | 1.95446800  | 0.96580300  |
| C | 9.43711400   | 2.38868700  | -1.34301300 |
| C | 11.13618600  | 2.90196000  | 0.81973500  |
| C | 10.47671000  | 3.32026400  | -1.45114600 |
| C | 11.33051800  | 3.57328500  | -0.38223700 |
| H | 11.77851400  | 3.11677400  | 1.66986400  |
| H | 10.60761200  | 3.85689300  | -2.38736600 |
| H | 12.13153800  | 4.30041300  | -0.48094300 |
| C | 9.64707600   | -1.43644700 | 0.13126700  |
| C | 10.53095500  | -1.51587500 | -0.96903000 |
| C | 9.97901400   | -2.09770700 | 1.34106200  |
| C | 11.74728800  | -2.19458200 | -0.82500400 |
| C | 11.20995000  | -2.75636200 | 1.44714200  |
| C | 12.09741000  | -2.80020800 | 0.37659500  |
| H | 12.42057900  | -2.25155700 | -1.67639800 |
| H | 11.46595800  | -3.24647800 | 2.38301100  |
| H | 13.04807600  | -3.31682300 | 0.47370900  |
| C | -10.19481600 | 0.92186200  | -2.31608000 |
| H | -9.12987400  | 1.01608100  | -2.54449800 |
| H | -10.44784400 | -0.14206700 | -2.35810900 |
| H | -10.75679100 | 1.42607500  | -3.10748200 |
| C | -9.03584100  | 2.15248300  | 2.52618500  |
| H | -8.46215600  | 1.23304900  | 2.65135900  |
| H | -8.30826500  | 2.96574400  | 2.41683700  |
| H | -9.59189300  | 2.33989100  | 3.44939800  |
| C | -8.50631100  | -2.21804000 | -2.52686000 |
| H | -8.16531500  | -1.18913600 | -2.65010100 |
| H | -7.60774500  | -2.83718000 | -2.41745900 |
| H | -9.00142300  | -2.52989300 | -3.45112300 |
| C | -9.93261500  | -1.29757100 | 2.31316800  |
| H | -8.87640900  | -1.13280400 | 2.54199900  |
| H | -10.43436700 | -0.32582300 | 2.35545200  |
| H | -10.35705800 | -1.92257000 | 3.10412400  |
| C | 9.03600800   | -2.15272100 | 2.52608700  |
| H | 8.46232300   | -1.23330400 | 2.65138400  |
| H | 8.30843300   | -2.96597900 | 2.41671700  |
| H | 9.59212500   | -2.34020600 | 3.44924500  |
| C | 10.19471600  | -0.92162600 | -2.31613200 |
| H | 9.12976400   | -1.01582800 | -2.54450900 |
| H | 10.44773600  | 0.14230900  | -2.35806800 |
| H | 10.75665500  | -1.42575600 | -3.10761200 |
| C | 9.93270300   | 1.29745200  | 2.31332900  |
| H | 8.87651100   | 1.13263700  | 2.54218500  |
| H | 10.43449100  | 0.32572100  | 2.35554700  |

|   |             |             |             |
|---|-------------|-------------|-------------|
| H | 10.35714900 | 1.92242600  | 3.10430400  |
| C | 8.50613900  | 2.21820800  | -2.52655400 |
| H | 8.16519400  | 1.18929700  | -2.64987500 |
| H | 7.60754300  | 2.83728000  | -2.41701500 |
| H | 9.00115900  | 2.53018900  | -3.45082300 |
| C | 4.87537500  | -3.43860700 | -0.00793300 |
| H | 5.43790800  | -3.78256700 | -0.88386200 |
| H | 5.41529600  | -3.79135500 | 0.87890300  |
| H | 3.90072400  | -3.93204900 | -0.02222200 |
| C | 4.20298000  | 2.49881600  | 0.02349200  |
| H | 4.64118300  | 2.95867000  | -0.87028200 |
| H | 3.15164700  | 2.78487300  | 0.06140200  |
| H | 4.70025300  | 2.94649000  | 0.89170900  |
| C | -4.20298000 | -2.49883700 | 0.02316200  |
| H | -4.64123600 | -2.95860300 | -0.87063100 |
| H | -3.15164600 | -2.78490100 | 0.06097700  |
| H | -4.70020600 | -2.94659600 | 0.89136500  |
| C | -4.87536600 | 3.43858800  | -0.00769100 |
| H | -5.43788400 | 3.78263000  | -0.88359700 |
| H | -5.41530200 | 3.79125600  | 0.87916900  |
| H | -3.90071400 | 3.93203100  | -0.02191700 |

**Table S5.** Z-matrix of the UB3LYP/6-311G(d,p)-optimized geometry of the radical cation of **m-2**.

|     |             |             |             |
|-----|-------------|-------------|-------------|
| 1 2 |             |             |             |
| C   | -8.28798800 | -0.74338100 | -0.03028600 |
| C   | -8.11650800 | 0.67855200  | 0.02764900  |
| C   | -6.81981400 | 1.18890100  | 0.02455000  |
| C   | -5.65666100 | 0.39444200  | 0.00318900  |
| C   | -5.83161200 | -1.04104200 | -0.00145700 |
| C   | -7.14852300 | -1.54287700 | -0.02435500 |
| C   | -4.33977200 | 1.01431300  | -0.00570900 |
| C   | -3.30344200 | 0.12636400  | 0.00172800  |
| C   | -3.48877300 | -1.31697300 | 0.00996900  |
| C   | -4.69924100 | -1.94498000 | 0.00825000  |
| C   | -1.82866400 | -0.08687800 | 0.00584100  |
| C   | -2.03012900 | -1.50295500 | 0.01138000  |
| C   | -0.55185200 | 0.48455700  | 0.00861900  |
| C   | 0.55187700  | -0.48455700 | 0.00864100  |
| C   | 0.29892200  | -1.88714000 | 0.01344000  |
| C   | -0.98373700 | -2.42252900 | 0.01569000  |
| C   | -0.29889700 | 1.88714100  | 0.01335500  |
| C   | 0.98376200  | 2.42253000  | 0.01557800  |
| C   | 2.03015300  | 1.50295500  | 0.01130800  |
| C   | 1.82868900  | 0.08687900  | 0.00583800  |
| C   | 3.48879800  | 1.31697300  | 0.00990400  |
| C   | 3.30346600  | -0.12636400 | 0.00173600  |
| C   | 4.69926500  | 1.94498000  | 0.00815000  |
| C   | 5.83163600  | 1.04104100  | -0.00151500 |
| C   | 5.65668400  | -0.39444200 | 0.00321000  |
| C   | 4.33979600  | -1.01431400 | -0.00565100 |
| C   | 7.14854600  | 1.54287300  | -0.02444400 |
| C   | 8.28801400  | 0.74338100  | -0.03033300 |



|   |              |             |             |
|---|--------------|-------------|-------------|
| C | 8.11653300   | -0.67855400 | 0.02767200  |
| C | 6.81983700   | -1.18889800 | 0.02461000  |
| H | -6.71337100  | 2.26718900  | 0.03962800  |
| H | -7.29274100  | -2.61716300 | -0.03810000 |
| H | 1.15066200   | -2.55720200 | 0.01894500  |
| H | -1.14131800  | -3.49515600 | 0.02094300  |
| H | -1.15063800  | 2.55720200  | 0.01883400  |
| H | 1.14134300   | 3.49515700  | 0.02078200  |
| H | 7.29276300   | 2.61715900  | -0.03824400 |
| H | 6.71339300   | -2.26718600 | 0.03974900  |
| C | 9.61712000   | 1.43686900  | -0.13073800 |
| C | 10.50487900  | 1.48988500  | 0.96842700  |
| C | 9.94118400   | 2.11659800  | -1.33282900 |
| C | 11.72201500  | 2.16678800  | 0.82789500  |
| C | 11.17534700  | 2.76859600  | -1.43343700 |
| C | 12.06766700  | 2.78969400  | -0.36606000 |
| H | 12.39984100  | 2.20867600  | 1.67594200  |
| H | 11.43102800  | 3.27139600  | -2.36207400 |
| H | 13.01990500  | 3.30299300  | -0.45971900 |
| C | 9.24388600   | -1.66675500 | 0.12560600  |
| C | 10.09270000  | -1.92686000 | -0.97491600 |
| C | 9.40012800   | -2.40471300 | 1.32704800  |
| C | 11.11549900  | -2.87247000 | -0.83661300 |
| C | 10.44543500  | -3.32983400 | 1.42536700  |
| C | 11.30586900  | -3.56045700 | 0.35644500  |
| H | 11.76314400  | -3.07243200 | -1.68571000 |
| H | 10.57701500  | -3.87891000 | 2.35368000  |
| H | 12.11016400  | -4.28409800 | 0.44843000  |
| C | -9.24387700  | 1.66674000  | 0.12551900  |
| C | -10.09271100 | 1.92671500  | -0.97501700 |
| C | -9.40015900  | 2.40476500  | 1.32691300  |
| C | -11.11554200 | 2.87230100  | -0.83678800 |
| C | -10.44550000 | 3.32985800  | 1.42516000  |
| C | -11.30593400 | 3.56037700  | 0.35621600  |
| H | -11.76320300 | 3.07216600  | -1.68589500 |
| H | -10.57711000 | 3.87898700  | 2.35343700  |
| H | -12.11025800 | 4.28399200  | 0.44814600  |
| C | -9.61710500  | -1.43685100 | -0.13064300 |
| C | -10.50488900 | -1.48969400 | 0.96850900  |
| C | -9.94117900  | -2.11669000 | -1.33266700 |
| C | -11.72204600 | -2.16657100 | 0.82803700  |
| C | -11.17536200 | -2.76866000 | -1.43321800 |
| C | -12.06769700 | -2.78960900 | -0.36585100 |
| H | -12.39989300 | -2.20832700 | 1.67607300  |
| H | -11.43104900 | -3.27155200 | -2.36180500 |
| H | -13.01995300 | -3.30288200 | -0.45946600 |
| C | 10.17518400  | 0.87828000  | 2.30970500  |
| H | 9.10845200   | 0.94679500  | 2.53967900  |
| H | 10.45572700  | -0.17880800 | 2.34713100  |
| H | 10.72138100  | 1.39084300  | 3.10602100  |
| C | 8.99714100   | 2.19328000  | -2.51634000 |
| H | 8.41160800   | 1.28269100  | -2.65405200 |

|   |              |             |             |
|---|--------------|-------------|-------------|
| H | 8.28384800   | 3.01909500  | -2.40412900 |
| H | 9.55584900   | 2.37907800  | -3.43749200 |
| C | 8.46777900   | -2.25536400 | 2.51288300  |
| H | 8.11715500   | -1.23141600 | 2.65275400  |
| H | 7.57757400   | -2.88676700 | 2.40218900  |
| H | 8.96827500   | -2.57025100 | 3.43241900  |
| C | 9.91562700   | -1.25341100 | -2.31540100 |
| H | 8.86323000   | -1.06202600 | -2.54166200 |
| H | 10.44313200  | -0.29539500 | -2.35426900 |
| H | 10.31917900  | -1.88250700 | -3.11327700 |
| C | -8.99712400  | -2.19352900 | -2.51615900 |
| H | -8.41152500  | -1.28299200 | -2.65393300 |
| H | -8.28389200  | -3.01938600 | -2.40387000 |
| H | -9.55583000  | -2.37936100 | -3.43730500 |
| C | -10.17520800 | -0.87789500 | 2.30970300  |
| H | -9.10848800  | -0.94643100 | 2.53972500  |
| H | -10.45569300 | 0.17921600  | 2.34695100  |
| H | -10.72146200 | -1.39030000 | 3.10608200  |
| C | -9.91564700  | 1.25311500  | -2.31542700 |
| H | -8.86324300  | 1.06179900  | -2.54172100 |
| H | -10.44306200 | 0.29504200  | -2.35414500 |
| H | -10.31930100 | 1.88207100  | -3.11336100 |
| C | -8.46783000  | 2.25551300  | 2.51277700  |
| H | -8.11714900  | 1.23159100  | 2.65269500  |
| H | -7.57766200  | 2.88696600  | 2.40207800  |
| H | -8.96836500  | 2.57040600  | 3.43229000  |
| C | -4.85399000  | -3.44059800 | 0.01360800  |
| H | -5.41933600  | -3.78086200 | 0.88789500  |
| H | -5.39022600  | -3.79068900 | -0.87517700 |
| H | -3.87986900  | -3.93348800 | 0.03189600  |
| C | -4.18504100  | 2.50994900  | -0.02122700 |
| H | -4.61714700  | 2.96643700  | 0.87601000  |
| H | -3.13538600  | 2.79929100  | -0.06788000 |
| H | -4.68955900  | 2.95350100  | -0.88606300 |
| C | 4.18506500   | -2.50995100 | -0.02108400 |
| H | 4.61719600   | -2.96638900 | 0.87616700  |
| H | 3.13540900   | -2.79929700 | -0.06769200 |
| H | 4.68956200   | -2.95354900 | -0.88590900 |
| C | 4.85401500   | 3.44059800  | 0.01343400  |
| H | 5.41936600   | 3.78090400  | 0.88770200  |
| H | 5.39024500   | 3.79064600  | -0.87537100 |
| H | 3.87989400   | 3.93348900  | 0.03170500  |

**Table S6.** Z-matrix of the (U)B3LYP/6-311G(d,p)-optimized geometry of the dication of **m-2**.**A) B3LYP/6-311G(D,P) CLOSED-SHELL STATE OF THE DICATION OF M-2.**

2 1

|   |             |             |             |
|---|-------------|-------------|-------------|
| C | -8.27209600 | 0.75138800  | 0.02206500  |
| C | -8.09939600 | -0.68288500 | -0.01798900 |
| C | -6.80172200 | -1.19505200 | -0.03501300 |
| C | -5.63983400 | -0.40421700 | -0.01493300 |
| C | -5.81543000 | 1.04364000  | 0.00524100  |
| C | -7.13225400 | 1.54740400  | 0.02613900  |
| C | -4.32906800 | -1.02946500 | -0.00365400 |
| C | -3.29088200 | -0.14004600 | -0.00668600 |
| C | -3.47711400 | 1.31148600  | -0.01469400 |
| C | -4.69215800 | 1.94589600  | -0.00877700 |
| C | -1.82739900 | 0.07088600  | -0.01064200 |
| C | -2.03648200 | 1.50079700  | -0.01522200 |
| C | -0.54879300 | -0.48883300 | -0.01279000 |
| C | 0.54877800  | 0.48884900  | -0.01286400 |
| C | 0.28675700  | 1.89144600  | -0.01546800 |
| C | -0.99456800 | 2.42643800  | -0.01693200 |
| C | -0.28677300 | -1.89142900 | -0.01519300 |
| C | 0.99455300  | -2.42642200 | -0.01658700 |
| C | 2.03646600  | -1.50078000 | -0.01501700 |
| C | 1.82738300  | -0.07086900 | -0.01064500 |
| C | 3.47709800  | -1.31146900 | -0.01452400 |
| C | 3.29086700  | 0.14006400  | -0.00673100 |
| C | 4.69214200  | -1.94587900 | -0.00851900 |
| C | 5.81541400  | -1.04362100 | 0.00535500  |
| C | 5.63981900  | 0.40423400  | -0.01502900 |
| C | 4.32905300  | 1.02948300  | -0.00383900 |
| C | 7.13223700  | -1.54738300 | 0.02632600  |
| C | 8.27207800  | -0.75136600 | 0.02213200  |
| C | 8.09938000  | 0.68290100  | -0.01812300 |
| C | 6.80170700  | 1.19506700  | -0.03521400 |
| H | -6.69675000 | -2.27261400 | -0.03507600 |
| H | -7.27295900 | 2.62135900  | 0.02066400  |
| H | 1.13575000  | 2.56524400  | -0.01881900 |
| H | -1.15464800 | 3.49827100  | -0.02025300 |
| H | -1.13576500 | -2.56522900 | -0.01844400 |
| H | 1.15463300  | -3.49825500 | -0.01975200 |
| H | 7.27294300  | -2.62133900 | 0.02102100  |
| H | 6.69673100  | 2.27262800  | -0.03540900 |
| C | 9.60175100  | -1.43006900 | 0.05879600  |
| C | 10.50399500 | -1.33013700 | -1.03365800 |
| C | 9.93032000  | -2.24494100 | 1.17889700  |
| C | 11.73610500 | -1.98658700 | -0.95621400 |
| C | 11.18170400 | -2.86370400 | 1.21631200  |
| C | 12.08613600 | -2.73349000 | 0.16287800  |
| H | 12.42050800 | -1.91946000 | -1.79683800 |
| H | 11.44978300 | -3.45832000 | 2.08469100  |
| H | 13.05097200 | -3.22859800 | 0.20951600  |
| C | 9.22961900  | 1.65468300  | -0.04711600 |

|   |              |             |             |
|---|--------------|-------------|-------------|
| C | 10.13256100  | 1.76249100  | 1.04557900  |
| C | 9.35804000   | 2.53081600  | -1.16378600 |
| C | 11.17536900  | 2.69059000  | 0.97241200  |
| C | 10.43008600  | 3.42394500  | -1.19718400 |
| C | 11.34006900  | 3.50426700  | -0.14278300 |
| H | 11.85640000  | 2.78216800  | 1.81342400  |
| H | 10.55401400  | 4.06645600  | -2.06393700 |
| H | 12.16230500  | 4.21154000  | -0.18643900 |
| C | -9.22961800  | -1.65468800 | -0.04687800 |
| C | -10.13257000 | -1.76239300 | 1.04582000  |
| C | -9.35796400  | -2.53099000 | -1.16342000 |
| C | -11.17533500 | -2.69054600 | 0.97276000  |
| C | -10.42996000 | -3.42418500 | -1.19670900 |
| C | -11.33996700 | -3.50439500 | -0.14232200 |
| H | -11.85638000 | -2.78203800 | 1.81376900  |
| H | -10.55382600 | -4.06683900 | -2.06336600 |
| H | -12.16216200 | -4.21172000 | -0.18589100 |
| C | -9.60177100  | 1.43009200  | 0.05862500  |
| C | -10.50399400 | 1.33003500  | -1.03383300 |
| C | -9.93036100  | 2.24509000  | 1.17862800  |
| C | -11.73610400 | 1.98649800  | -0.95649000 |
| C | -11.18174900 | 2.86385000  | 1.21595300  |
| C | -12.08616000 | 2.73352000  | 0.16251500  |
| H | -12.42048600 | 1.91928300  | -1.79712300 |
| H | -11.44984800 | 3.45855600  | 2.08426300  |
| H | -13.05099800 | 3.22863100  | 0.20908100  |
| C | 10.16874800  | -0.61166600 | -2.32049100 |
| H | 9.09265800   | -0.52604400 | -2.48390500 |
| H | 10.59498300  | 0.39598800  | -2.34043300 |
| H | 10.58717500  | -1.15656500 | -3.17117000 |
| C | 8.99773600   | -2.47177700 | 2.35208600  |
| H | 8.35112800   | -1.61772400 | 2.56078400  |
| H | 8.34745100   | -3.33869500 | 2.18230100  |
| H | 9.57328600   | -2.68465900 | 3.25629400  |
| C | 8.40313400   | 2.53266900  | -2.34090200 |
| H | 7.98800700   | 1.54755600  | -2.56046500 |
| H | 7.55888800   | 3.21170800  | -2.16941700 |
| H | 8.91337100   | 2.88829700  | -3.23936900 |
| C | 9.97487600   | 0.98213800  | 2.32995400  |
| H | 8.95143900   | 0.63711200  | 2.48789400  |
| H | 10.63314700  | 0.10839700  | 2.35035000  |
| H | 10.24467100  | 1.61103700  | 3.18288000  |
| C | -8.99780000  | 2.47205000  | 2.35180900  |
| H | -8.35131400  | 1.61795200  | 2.56071400  |
| H | -8.34738700  | 3.33884200  | 2.18187300  |
| H | -9.57336100  | 2.68519700  | 3.25594700  |
| C | -10.16872600 | 0.61141700  | -2.32057700 |
| H | -9.09263300  | 0.52577300  | -2.48396500 |
| H | -10.59496100 | -0.39623900 | -2.34040400 |
| H | -10.58714200 | 1.15621400  | -3.17132700 |
| C | -9.97492000  | -0.98186800 | 2.33009600  |
| H | -8.95146100  | -0.63692600 | 2.48807500  |

|   |              |             |             |
|---|--------------|-------------|-------------|
| H | -10.63310000 | -0.10805200 | 2.35030500  |
| H | -10.24485500 | -1.61061300 | 3.18309100  |
| C | -8.40301700  | -2.53297800 | -2.34050300 |
| H | -7.98782100  | -1.54790700 | -2.56011400 |
| H | -7.55882300  | -3.21206300 | -2.16894000 |
| H | -8.91324500  | -2.88863000 | -3.23896600 |
| C | -4.84007300  | 3.44115700  | -0.01005300 |
| H | -5.40380400  | 3.78426400  | -0.88399900 |
| H | -5.37415900  | 3.78945400  | 0.88022700  |
| H | -3.86520300  | 3.93143600  | -0.02773200 |
| C | -4.17667600  | -2.52459500 | 0.00471900  |
| H | -4.61618100  | -2.97545300 | -0.89126600 |
| H | -3.12764100  | -2.81660300 | 0.04068600  |
| H | -4.67331300  | -2.96999800 | 0.87290200  |
| C | 4.17666000   | 2.52461400  | 0.00430900  |
| H | 4.61618000   | 2.97533800  | -0.89173600 |
| H | 3.12762500   | 2.81662700  | 0.04021400  |
| H | 4.67328100   | 2.97014700  | 0.87243500  |
| C | 4.84005600   | -3.44114000 | -0.00956700 |
| H | 5.40378400   | -3.78438100 | -0.88346100 |
| H | 5.37414400   | -3.78929900 | 0.88076600  |
| H | 3.86518600   | -3.93142100 | -0.02716700 |

**B) UB3LYP/6-311G(D,P) OPEN-SHELL BROKEN SYMMETRY - DICATION OF M-2.**

2 1

|   |             |             |             |
|---|-------------|-------------|-------------|
| C | -8.27423100 | 0.75245700  | 0.02116100  |
| C | -8.10172100 | -0.68182500 | -0.01690700 |
| C | -6.80415300 | -1.19399100 | -0.03536500 |
| C | -5.64309600 | -0.40210200 | -0.01576600 |
| C | -5.81870800 | 1.04530900  | 0.00440600  |
| C | -7.13416200 | 1.54943400  | 0.02684200  |
| C | -4.33080900 | -1.02650400 | -0.00481400 |
| C | -3.29388500 | -0.13703800 | -0.00891100 |
| C | -3.48038000 | 1.31446400  | -0.01697100 |
| C | -4.69287900 | 1.94825500  | -0.01080300 |
| C | -1.82846000 | 0.07628700  | -0.01360200 |
| C | -2.03485100 | 1.50090100  | -0.01813600 |
| C | -0.54855000 | -0.48746300 | -0.01610200 |
| C | 0.54854100  | 0.48752400  | -0.01615700 |
| C | 0.28935400  | 1.89050300  | -0.01905800 |
| C | -0.99151600 | 2.42564200  | -0.02039500 |
| C | -0.28936300 | -1.89044200 | -0.01892200 |
| C | 0.99150700  | -2.42558200 | -0.02027500 |
| C | 2.03484200  | -1.50084000 | -0.01812100 |
| C | 1.82845100  | -0.07622600 | -0.01367500 |
| C | 3.48037000  | -1.31440300 | -0.01702700 |
| C | 3.29387700  | 0.13709900  | -0.00905900 |
| C | 4.69286900  | -1.94819500 | -0.01085900 |
| C | 5.81869800  | -1.04524800 | 0.00424000  |
| C | 5.64308700  | 0.40216100  | -0.01602300 |

|   |              |             |             |
|---|--------------|-------------|-------------|
| C | 4.33080100   | 1.02656500  | -0.00506000 |
| C | 7.13415200   | -1.54937100 | 0.02671200  |
| C | 8.27422000   | -0.75239500 | 0.02093800  |
| C | 8.10171400   | 0.68188800  | -0.01721500 |
| C | 6.80414400   | 1.19405100  | -0.03566300 |
| H | -6.69807900  | -2.27143300 | -0.03442800 |
| H | -7.27452100  | 2.62339100  | 0.02126700  |
| H | 1.13902800   | 2.56325000  | -0.02281800 |
| H | -1.15095500  | 3.49764400  | -0.02392200 |
| H | -1.13903700  | -2.56319000 | -0.02260400 |
| H | 1.15094600   | -3.49758400 | -0.02373700 |
| H | 7.27451400   | -2.62333000 | 0.02127200  |
| H | 6.69806300   | 2.27149000  | -0.03470600 |
| C | 9.60491500   | -1.42674800 | 0.05382200  |
| C | 10.51106800  | -1.31139100 | -1.03587200 |
| C | 9.93556500   | -2.25100600 | 1.16727000  |
| C | 11.74852600  | -1.95798900 | -0.95956300 |
| C | 11.19150500  | -2.85921600 | 1.20323500  |
| C | 12.09982800  | -2.71172000 | 0.15398000  |
| H | 12.43515300  | -1.87851300 | -1.79726600 |
| H | 11.46218300  | -3.45881100 | 2.06734100  |
| H | 13.06828100  | -3.19972300 | 0.20045300  |
| C | 9.23443500   | 1.64996600  | -0.04056200 |
| C | 10.14078300  | 1.74518700  | 1.05211400  |
| C | 9.36603900   | 2.53426200  | -1.15084300 |
| C | 11.19129400  | 2.66506300  | 0.98257500  |
| C | 10.44465400  | 3.41889800  | -1.18017500 |
| C | 11.35898500  | 3.48466800  | -0.12725200 |
| H | 11.87482900  | 2.74591600  | 1.82264200  |
| H | 10.57204800  | 4.06642900  | -2.04266400 |
| H | 12.18631400  | 4.18610900  | -0.16873800 |
| C | -9.23442300  | -1.64991900 | -0.04039000 |
| C | -10.14097000 | -1.74512800 | 1.05212100  |
| C | -9.36570700  | -2.53433500 | -1.15059900 |
| C | -11.19139400 | -2.66509300 | 0.98244300  |
| C | -10.44423300 | -3.41907600 | -1.18007700 |
| C | -11.35878800 | -3.48481300 | -0.12734700 |
| H | -11.87509000 | -2.74593400 | 1.82237900  |
| H | -10.57136700 | -4.06672500 | -2.04251600 |
| H | -12.18604100 | -4.18633600 | -0.16893500 |
| C | -9.60494200  | 1.42679000  | 0.05385400  |
| C | -10.51098000 | 1.31125000  | -1.03591400 |
| C | -9.93579100  | 2.25109700  | 1.16721500  |
| C | -11.74849200 | 1.95776700  | -0.95980500 |
| C | -11.19178500 | 2.85920700  | 1.20298600  |
| C | -12.09997100 | 2.71157100  | 0.15363200  |
| H | -12.43502700 | 1.87815100  | -1.79757000 |
| H | -11.46262200 | 3.45882500  | 2.06702600  |
| H | -13.06847000 | 3.19949600  | 0.19996000  |
| C | 10.17286300  | -0.59243900 | -2.32147300 |
| H | 9.09721500   | -0.48541800 | -2.47179300 |
| H | 10.62070200  | 0.40555600  | -2.35240300 |

|   |              |             |             |
|---|--------------|-------------|-------------|
| H | 10.56922700  | -1.15062000 | -3.17431500 |
| C | 9.00180100   | -2.49510600 | 2.33587500  |
| H | 8.34948100   | -1.64718900 | 2.55141900  |
| H | 8.35715600   | -3.36397100 | 2.15548400  |
| H | 9.57663700   | -2.71380800 | 3.23912000  |
| C | 8.40881600   | 2.55192900  | -2.32578800 |
| H | 7.98558100   | 1.57171900  | -2.55151900 |
| H | 7.57011500   | 3.23576800  | -2.14685200 |
| H | 8.91964000   | 2.91067200  | -3.22266800 |
| C | 9.97673000   | 0.96389900  | 2.33503200  |
| H | 8.95815500   | 0.59956800  | 2.47772900  |
| H | 10.65234600  | 0.10381800  | 2.36833300  |
| H | 10.22084500  | 1.60002500  | 3.19053700  |
| C | -9.00224600  | 2.49528800  | 2.33597600  |
| H | -8.34999300  | 1.64737400  | 2.55173700  |
| H | -8.35754100  | 3.36411700  | 2.15563300  |
| H | -9.57725600  | 2.71409600  | 3.23908600  |
| C | -10.17260800 | 0.59212300  | -2.32137200 |
| H | -9.09693600  | 0.48520300  | -2.47160200 |
| H | -10.62032300 | -0.40593200 | -2.35215700 |
| H | -10.56898400 | 1.15011000  | -3.17433500 |
| C | -9.97720700  | -0.96375700 | 2.33502700  |
| H | -8.95867000  | -0.59939900 | 2.47792200  |
| H | -10.65284600 | -0.10368500 | 2.36813100  |
| H | -10.22149400 | -1.59983300 | 3.19051900  |
| C | -8.40814100  | -2.55209100 | -2.32526400 |
| H | -7.98480700  | -1.57190400 | -2.55091200 |
| H | -7.56951400  | -3.23594700 | -2.14603800 |
| H | -8.91870800  | -2.91086000 | -3.22228000 |
| C | -4.84252500  | 3.44360800  | -0.01228400 |
| H | -5.40630000  | 3.78671200  | -0.88625500 |
| H | -5.37611300  | 3.79219200  | 0.87825700  |
| H | -3.86780400  | 3.93425000  | -0.03029800 |
| C | -4.17830000  | -2.52180900 | 0.00401300  |
| H | -4.61730500  | -2.97342300 | -0.89191300 |
| H | -3.12912500  | -2.81317800 | 0.04015300  |
| H | -4.67444300  | -2.96739600 | 0.87244600  |
| C | 4.17829100   | 2.52187000  | 0.00368300  |
| H | 4.61727000   | 2.97343100  | -0.89228300 |
| H | 3.12911700   | 2.81324100  | 0.03983300  |
| H | 4.67445900   | 2.96750900  | 0.87207600  |
| C | 4.84251600   | -3.44354800 | -0.01222400 |
| H | 5.40625800   | -3.78672300 | -0.88618800 |
| H | 5.37613900   | -3.79205700 | 0.87832600  |
| H | 3.86779400   | -3.93419200 | -0.03016000 |

**Table S7.** Normal mode description of the more intense Raman wavenumbers (b3lyp-6-311g\*\*) of the [3]naphthylene **m-1** model molecule (which is **1** without methyl nor xylyl groups) in the 1800–800  $\text{cm}^{-1}$  spectral region. To clarify, similar vibrational contributions were accumulated in a single term. The meaning of the symbols is:  $\nu$ (stretching mode),  $\delta$ (in-plane bending mode), CBD(vibration of the cyclobutadienoid moieties), NAP(vibrations of the naphthalene moieties), CH(carbon–hydrogen bond).

| Experimental wavenumber ( $\text{cm}^{-1}$ ) | Experimental Raman intensity | Calculated wavenumber ( $\text{cm}^{-1}$ ) | Calculated Raman activity | Potential energy distribution (contributions greater than 10%) |
|----------------------------------------------|------------------------------|--------------------------------------------|---------------------------|----------------------------------------------------------------|
| 1700                                         | strong                       | 1730                                       | 17410                     | 55 $\nu$ (NAP), 30(CBD)                                        |
| 1607                                         | weak                         | 1615                                       | 59                        | 72(NAP), 14 $\nu$ (CBD)                                        |
| 1538                                         | weak                         | 1555                                       | 2335                      | 90(NAP)                                                        |
| 1448                                         | strong                       | 1468                                       | 10281                     | 82(NAP), 20 $\delta$ (CH)                                      |
| 1424                                         | weak                         | 1436                                       | 570                       | 55 $\delta$ (CH), 21 $\nu$ (CBD), 19 $\nu$ (NAP)               |
| 1424                                         | weak                         | 1408                                       | 3246                      | 58 $\delta$ (CH), 25 $\nu$ (CBD)                               |
| 1375                                         | weak                         | 1358                                       | 2064                      | 100 $\nu$ (NAP)                                                |
| 1355                                         | strong                       | 1354                                       | 10044                     | 100 $\nu$ (NAP), 12 $\delta$ (CH)                              |
| 1215                                         | weak                         | 1208                                       | 7                         | 44 $\nu$ (NAP), 43 $\delta$ (CH)                               |
| 1167                                         | weak                         | 1174                                       | 235                       | 38 $\nu$ (NAP), 37 $\delta$ (CH), 20 $\delta$ (NAP)            |
| 1082                                         | medium                       | 1118                                       | 3281                      | 78 $\nu$ (CBD), 16 $\delta$ (CH)                               |
| 1032                                         | weak                         | 1052                                       | 405                       | 65 $\nu$ (NAP), 14 $\delta$ (CH)                               |
| 1026                                         | weak                         | 1034                                       | 2                         | 43 $\nu$ (CBD), 31 $\delta$ (CH)                               |
| 841                                          | weak                         | 855                                        | 36                        | 32 $\nu$ (CBD), 29 $\nu$ (NAP),                                |

**Figure S2.** Full vibrational normal mode associated with the theoretical Raman band of **m-1** at  $1730 \text{ cm}^{-1}$ . The size of the spheres is proportional to the vibrational amplitudes (blue is for the elongation and yellow for the compression motion respectively)

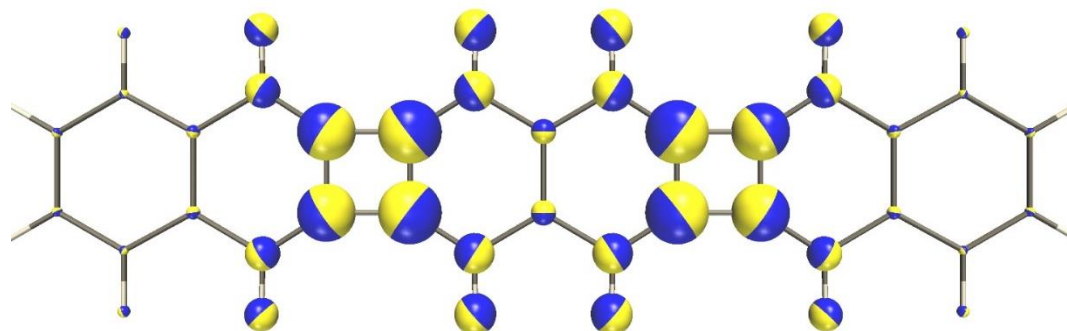



**Figure S3.** Theoretical Raman spectrum (dotted line) of an unsubstituted model of **2** (denoted as **m-2**) which is **2** without methyl nor xylyl groups compared with the experimental (solid line) FT-Raman spectrum of **2** in the solid state at room temperature.

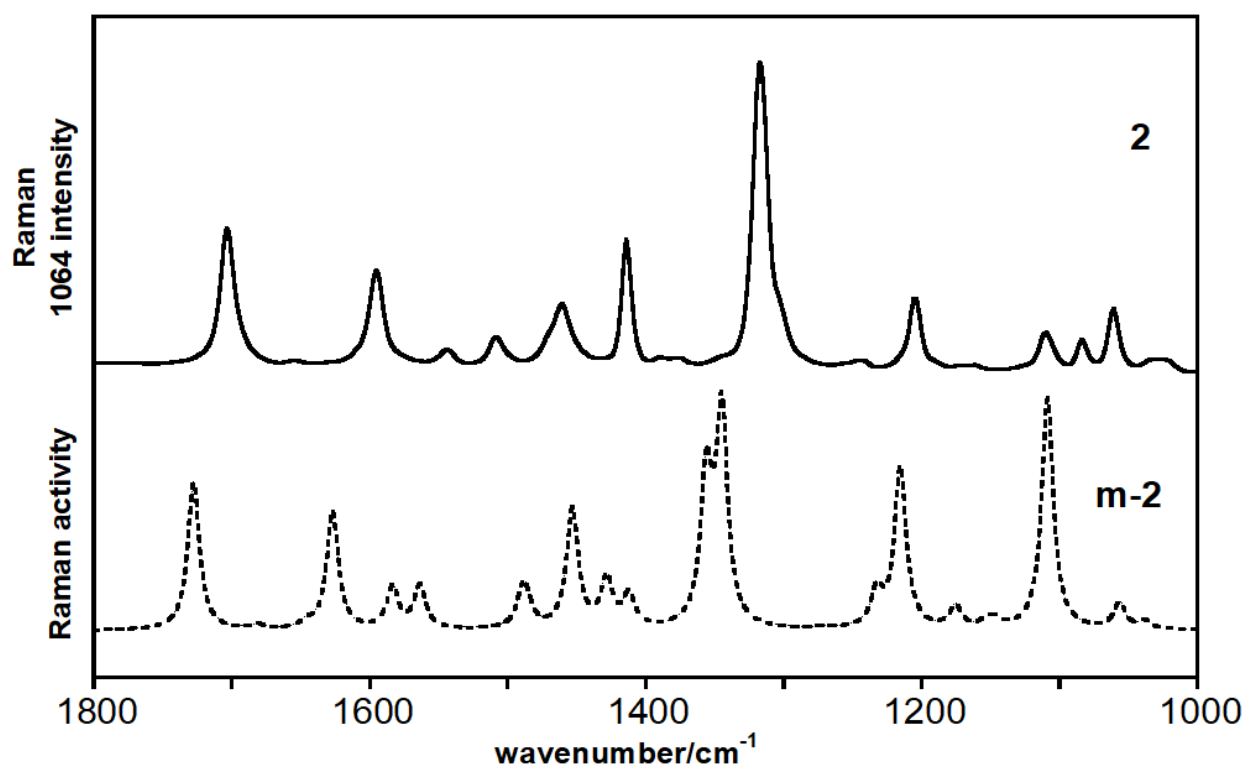

### Force field calculations

Quadratic (harmonic) Cartesian force constants were evaluated within the same theoretical scheme used for the geometry optimizations. The Cartesian force constants were transformed into a set of non-redundant locally symmetrised internal coordinates following the Wilson procedure.<sup>[1]</sup> This method starts with the definition of a full space of displacement internal coordinates  $\mathbf{R}$ , where  $\mathbf{R}$  can be built from a full set of bond stretching, angle bending or torsional vibrations.<sup>[2-4]</sup> For molecules, local (three branches) and cyclic redundancies usually occur and can be completely removed by defining a new set of  $3N-6$  symmetry or group coordinates  $\mathbf{S}$ , orthogonal to the redundancy conditions to remove systematically all redundancies occurring in our system.<sup>[5]</sup> Molecular symmetry allows for factorising the force constant matrix into one square matrix for each symmetry species of the punctual group to which the molecule belongs, being null all the interaction constants between coordinates of different symmetry. Here, force field calculation was restricted to the totally symmetric species ( $A_g$  in both the  $D_{2h}$  and the  $C_{2h}$  groups, to which the **m-1** and the **m-2** model molecules belong, respectively).

In matrix notation the linear transformations between coordinates are  $\mathbf{R} = \mathbf{B}\mathbf{x}$  and  $\mathbf{S} = \mathbf{U}\mathbf{R}$ . Then the potential energy in Cartesian coordinates,  $2V = \mathbf{x}^t \mathbf{F}_x \mathbf{x}$ , can be re-expressed in terms of the  $\mathbf{S}$  coordinates as:

$$2V = \mathbf{S}^t \mathbf{U}^{-1t} \mathbf{B}^{-1t} \mathbf{F}_x \mathbf{B}^{-1} \mathbf{U}^{-1} \mathbf{S}$$

Then, the equation for the vibrational problem of any finite molecule is:

$$\mathbf{G}_S \mathbf{F}_S \mathbf{L}_S = \mathbf{L}_S \mathbf{A}$$

where  $\mathbf{G}_S$  is the kinetic energy matrix, which contains information about the atoms which constitute the molecule and their equilibrium positions,  $\mathbf{F}_S$  is the matrix of the locally symmetrized force constants,  $\mathbf{L}_S$  is the matrix of the vibrational amplitudes and  $\mathbf{A}$  is the diagonal eigenvalue matrix. The normal frequencies  $\lambda_i$ , in  $\text{cm}^{-1}$ , can be obtained from eigenvalues,  $\nu_i$ , through the relation  $\nu_i = (\lambda_i / 4\pi^2 c^2)^{1/2}$ .

- [1] E.B. Wilson, J.C. Decius, P.C. Cross, *Molecular Vibrations*, McGraw-Hill, New York, 1955.
- [2] S. Califano, *Vibrational States*, Wiley, New York, 1976.
- [3] L.A. Gribov, W.J. Orville-Thomas, *Theory and Methods of Calculations of Molecular Spectra*, Wiley, New York, 1988.
- [4] G. Zerbi, *Vibrational Intensities in Infrared and Raman Spectroscopy*, Elsevier, Amsterdam, 1984.
- [5] P. Pulay, G. Fogarasi, G. Pongor, J.E. Boggs, *J. Am. Chem. Soc.* 102 (1979) 2550.

**Figure S4.** Theoretical Raman spectra ((U)b3lyp-6-311g\*\*) of neutral (black line) and oxidized species of **m-1**, radical cation (blue line) and dication (red line).

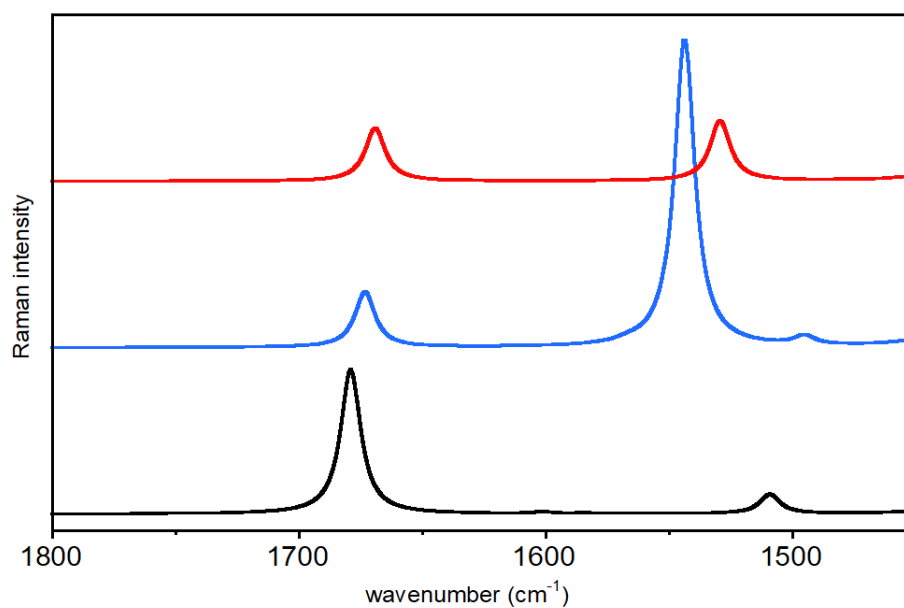

**Figure S5.** Theoretical Raman spectra ((U)b3lyp-6-311g\*\*) of neutral (black line) and oxidized species of **m-2**, radical cation (blue line) and dication (red line).

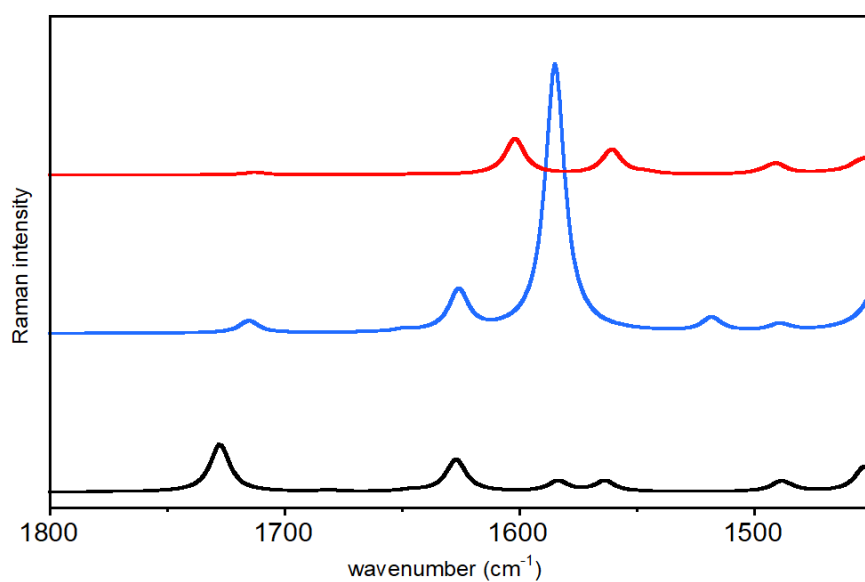

**Figure S6.** ACID plots of neutral (top) and radical cation (bottom) **m-1** at an isosurface value of 0.04. Current density vectors (green arrows with red arrowheads) are plotted onto the isosurface. The level of theory for the neutral species was b3lyp/6-311g(d), while for the radical cation was ub3lyp/6-311g(d).

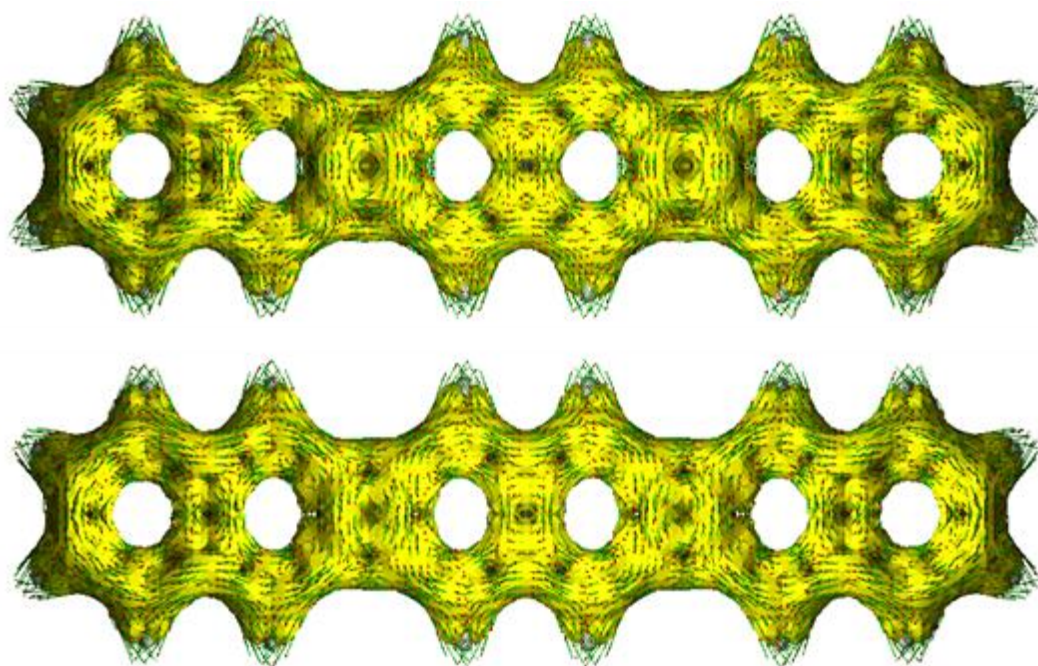

**Figure S7.** ACID plots of neutral (top) and radical cation (bottom) **m-2** at an isosurface value of 0.04. Current density vectors (green arrows with red arrowheads) are plotted onto the isosurface. The level of theory for the neutral species was b3lyp/6-311g(d), while for the radical cation was ub3lyp/6-311g(d).

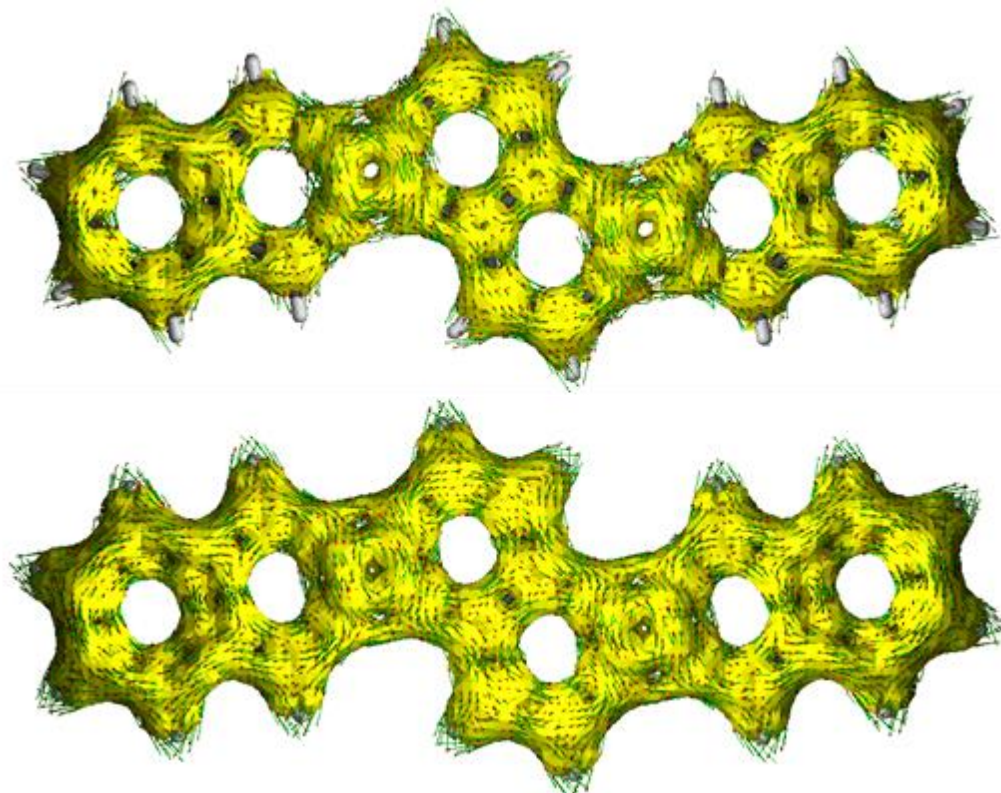

Supplement: Additional file 1 [file 1860-5397-21-20-S1.pdf]
